# Supplementary material for: Effect of solvent vapour annealing on bismuth triiodide film for photovoltaic applications and its optoelectronic properties
Source: Royal Society of Chemistry journal article supplement (doi:10.1039/d0tc02455d), 2020-01-01
Supplement: d0tc02455d1.pdf [file d0tc02455d1.pdf]

## Supporting Information

### Effect of Solvent Vapour Annealing on Bismuth Triiodide Film for Photovoltaic Applications and its Optoelectronic Properties

Muthu Gomathy M. Pandian,<sup>a,b†</sup> Dhruva B. Khadka,<sup>a†\*</sup> Yasuhiro Shirai,<sup>a\*</sup> Shodruz Umedov,<sup>a,c</sup> Masatoshi Yanagida,<sup>a</sup> Shanthi Subashchandran,<sup>b</sup> Anastasia Grigorieva,<sup>c</sup> and Kenjiro Miyano<sup>a</sup>

<sup>a</sup>Photovoltaic Materials Group, Center for GREEN Research on Energy and Environmental Materials, National Institute for Materials Science (NIMS), 1-1 Namiki, Tsukuba, Ibaraki 305-0044, Japan.

<sup>b</sup>Crystal Growth Centre, Anna University, Chennai-600025, Tamil Nadu, India.

<sup>c</sup> Faculty of Materials Science and Faculty of Chemistry, Lomonosov Moscow State University, Leninskie gory - 1, bld. 3, Moscow, 119991 Russia

#### Corresponding Author

\*KHADKA.B.Dhruba@nims.go.jp

\*SHIRAI.Yasuhiro@nims.go.jp

## Table and Figures

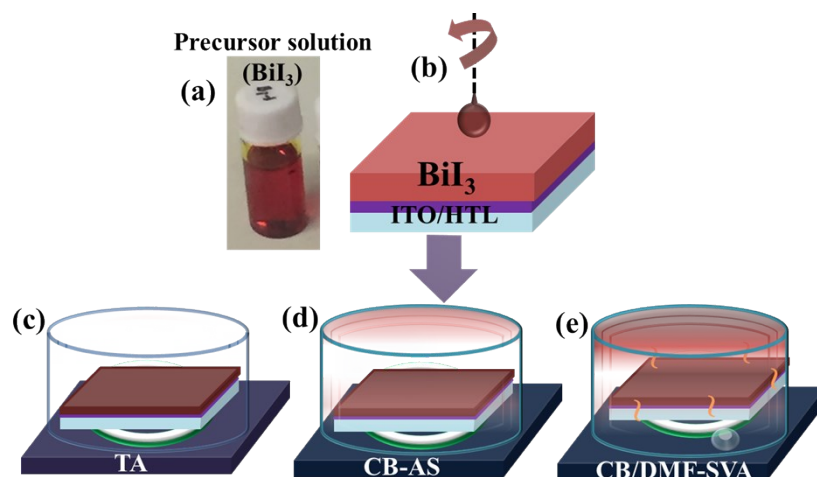

**Figure S1.** Schematic of the fabrication approach of the  $\text{BiI}_3$  thin film. (a) Precursor solution of  $\text{BiI}_3$ , (b) precursor deposition on the ITO/HTL substrate. The crystallization of  $\text{BiI}_3$  thin film by (c) thermal annealing (TA), (d) annealing the antisolvent (chlorobenzene (CB)) dripped film (AS), and (e) annealing under ambient solvent (CB or dimethylformamide (DMF)) vapor (CB or DMF-SVA).

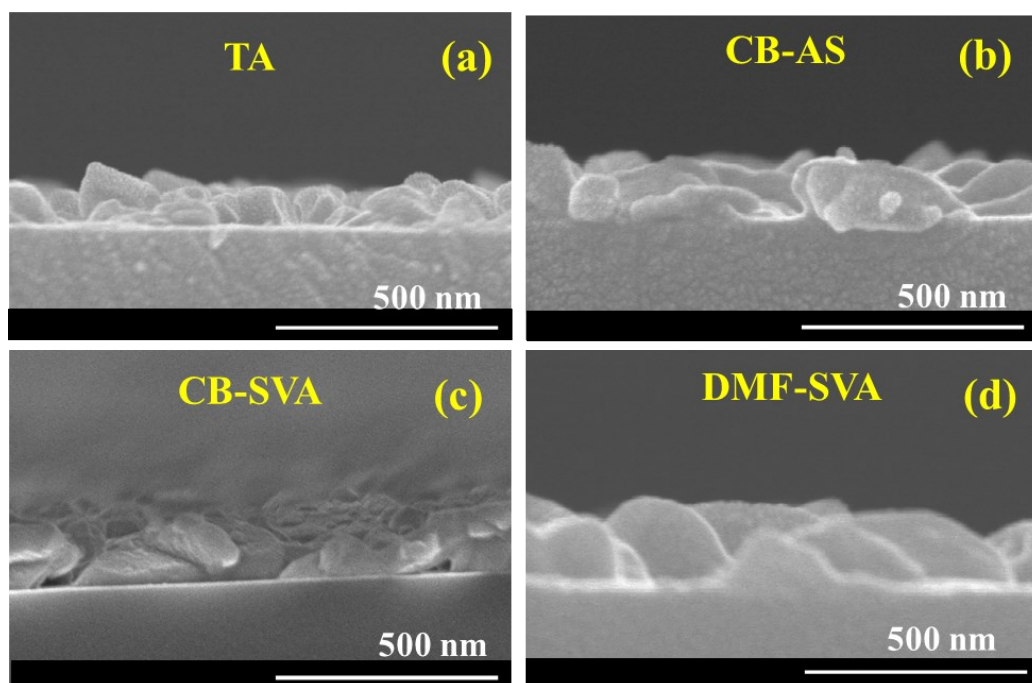

**Figure S2.** Cross-sectional SEM images of the BiI<sub>3</sub> thin films crystallized via (a) TA, (b) CB-AS, (c) CB-SVA, (d) DMF-SVA.

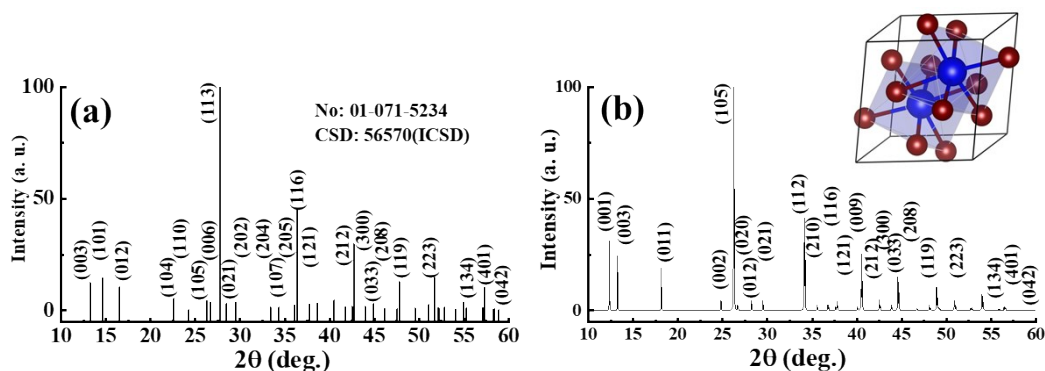

**Figure S3.** XRD pattern of BiI<sub>3</sub> (tetragonal) (ICSD-56570) as references (Inorganic Crystal Structure Database) and calculated XRD pattern from the VESTA using BiI<sub>3</sub> crystal CIF file.

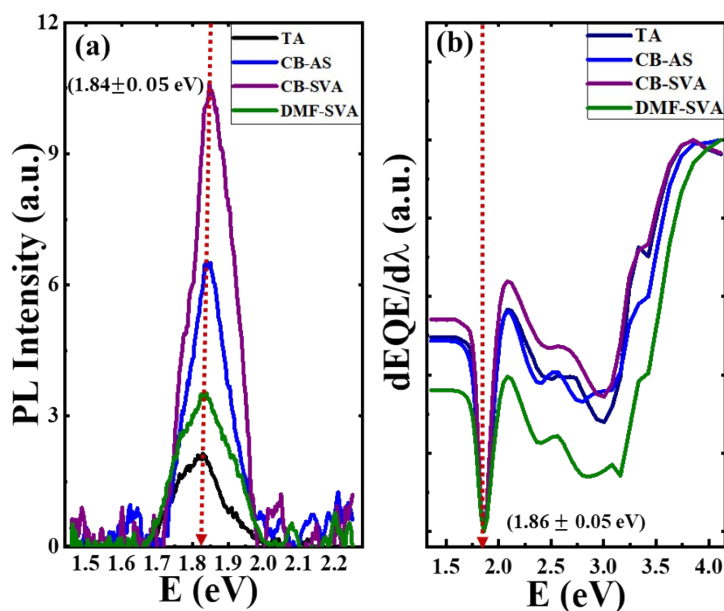

**Figure S4.** The PL spectra of BiI<sub>3</sub> thin films crystallized under different ambient conditions (a) and (b) bandgap energy ( $E_g$ ) estimated from the differentiation of EQE spectra (Fig. 3d and Fig. S6b).

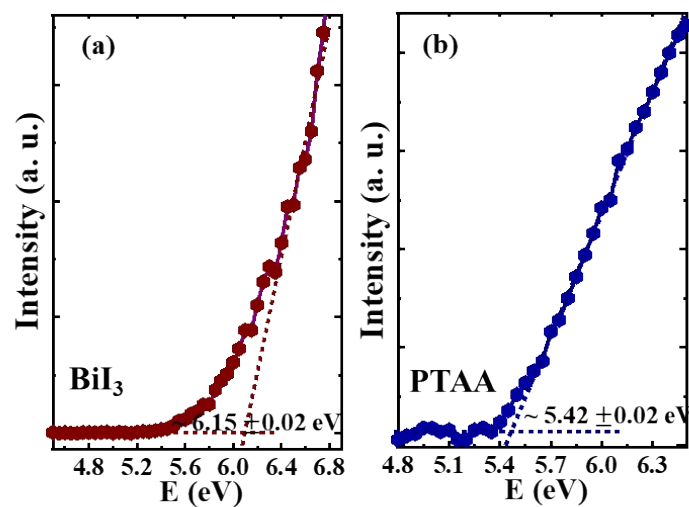

**Figure S5.** Photoelectron spectra of (a)  $\text{BiI}_3$  film and (b) plasma-treated PTAA HTL layer.

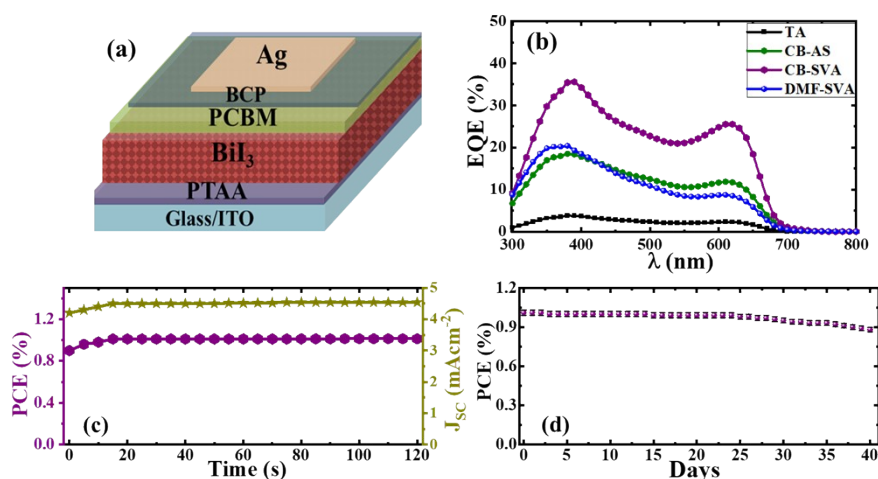

**Figure S6.** (a) Schematics of the device structure, (b) *EQE* spectra of corresponding devices. (c) Steady-state  $J_{\text{SC}}$  and PCE of the  $\text{BiI}_3$  device prepared by CB-SVA approach at maximum power point tracking (MPPT) under AM 1.5G  $100 \text{ mW cm}^{-2}$  illumination and (d) stability of the device stored in ambient air conditions.

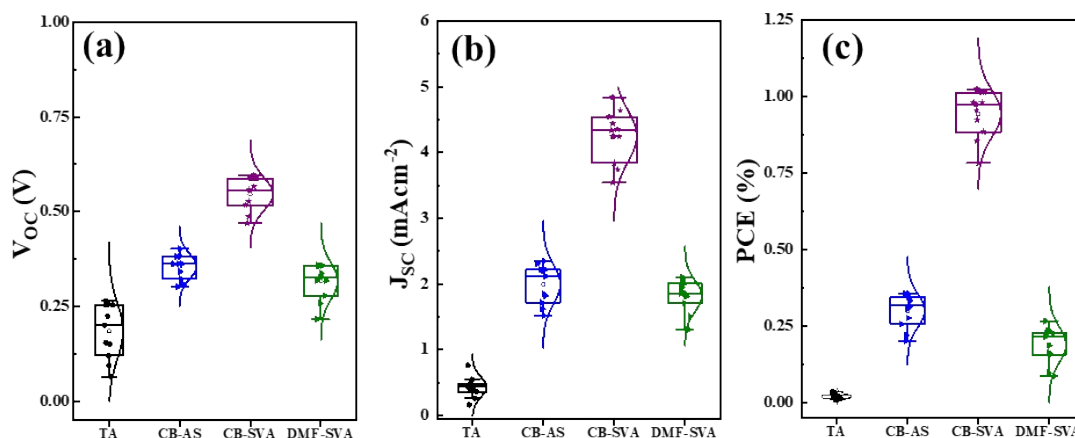

**Figure S7.** Statistics of device parameters for the BiI<sub>3</sub> based solar cells with BiI<sub>3</sub> thin film fabricated by various methods; TA, CB-AS, CB, or DMF-SVA. Histogram of device parameters: (a)  $V_{OC}$ , (b)  $J_{SC}$ , and (c)  $PCE$  ( $\eta$ ) of 12 devices fabricated four different batches.

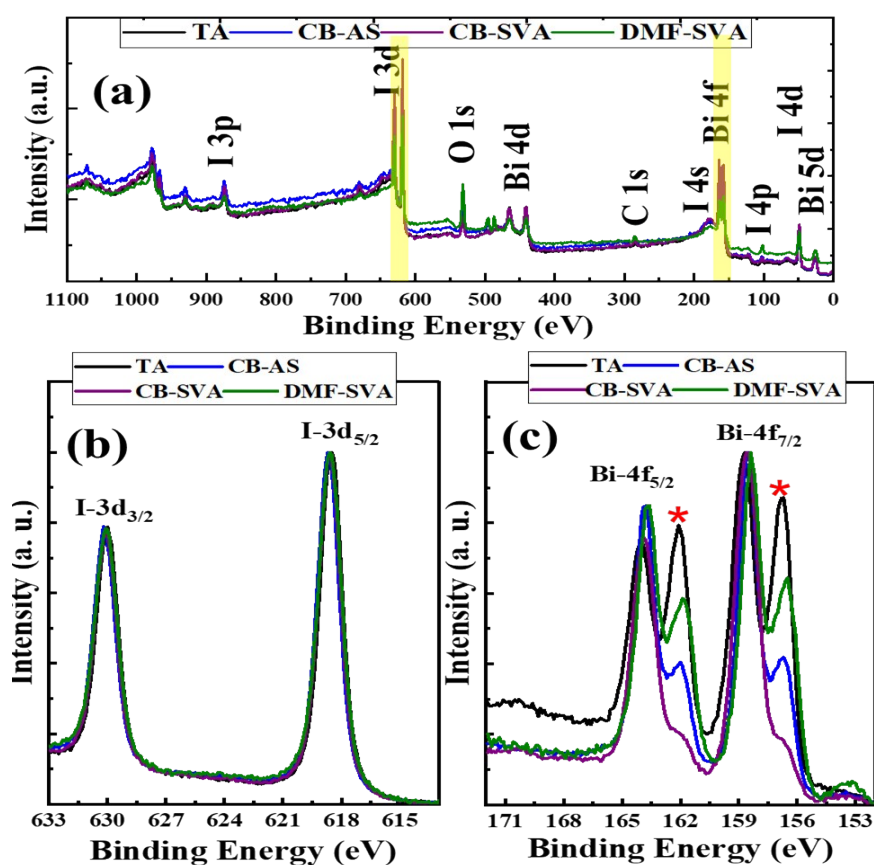

**Figure S8.** XPS spectra of BiI<sub>3</sub> films prepared under different conditions. (a) Survey spectra, (b) The core-level peak for I-3d, and (c) Bi-4f. The two asteric symbols in the plot (c) at ~162 eV and 157 eV assigned for metallic Bi. Note that the spectra (b) and (c) are normalized.

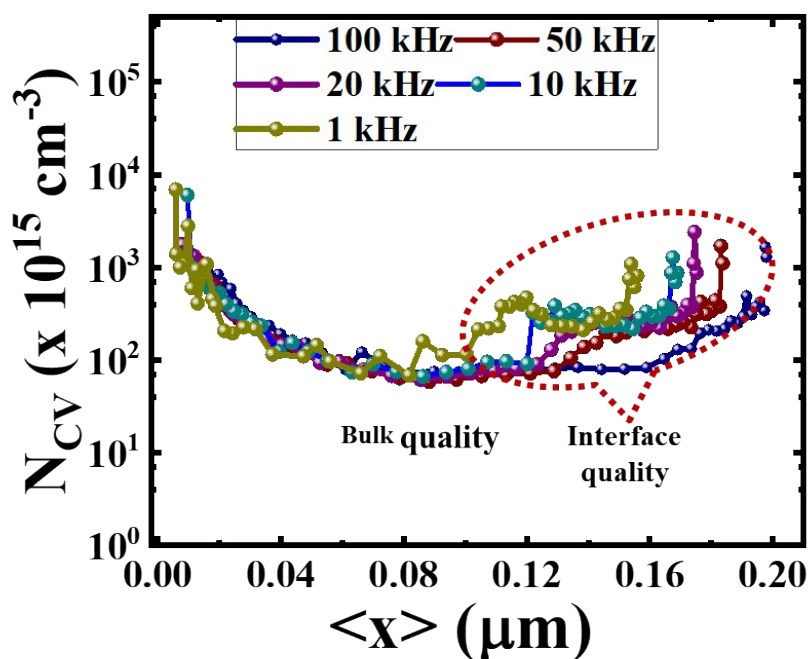

**Figure S9.** The density (carrier + defect) profile of the  $\text{BiI}_3$  device prepared by the CB-SVA approach extracted from capacitance-voltage ( $C$ - $V$ ) curves at different modulated frequencies bias.

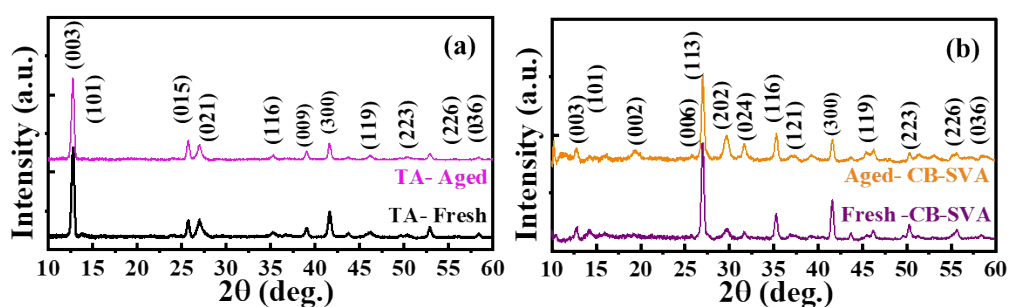

**Fig. S10.** The XRD patterns of fresh and aged (kept under ambient air for 30 days)  $\text{BiI}_3$  (TA (a) and CB-SVA) (b) films.
